# Supplementary material for: Hypermethylation Loci of ZNF671, IRF8, and OTX1 as Potential Urine-Based Predictive Biomarkers for Bladder Cancer
Source: MDPI journal article supplement (doi:10.3390/diagnostics14050468), 2024-02-21
Supplement: s1 [file s1]

**Supplementary Table S1.** Primer sequences, annealing temperatures, and amplicon information for the qMSP assay used in the study

| Primer name | Sequence                         | T <sub>m</sub> (°C) | Amplicon (bp) |
|-------------|----------------------------------|---------------------|---------------|
| ZNF671_F    | 5'-TTTGGTCGGGGTTTGTAAAC-3'       | 62.4                | 100           |
| ZNF671_R    | 5'-AACATCAAACGCGTCTCG -3'        | 61.4                |               |
| OTX1_F      | 5'-TCGATTTTGTTTTACGTTTGTC -3'    | 60.9                | 109           |
| OTX1_R      | 5'-CTAAAAACGCGCTCCTCC -3'        | 62.9                |               |
| IRF8_F      | 5'-ATTTTCGGGGTTGTTTCGTTC 3'      | 63.7                | 120           |
| IRF8_R      | 5'-CACCTAAAATCCAAAAACGACG -3'    | 63.1                |               |
| COL2A1_F    | 5'-GGGAAGATGGGATAGAAGGGAATAT -3' | 65.8                | 89            |
| COL2A1_F    | 5'-AACAATTATAAACTCCAACCAC -3'    | 56.2                |               |
