# Supplementary material for: Hypermethylation Loci of ZNF671, IRF8, and OTX1 as Potential Urine-Based Predictive Biomarkers for Bladder Cancer
Source: MDPI journal article supplement (doi:10.3390/diagnostics14050468), 2024-02-21
Supplement: s1 [file s1]

# Kaplan-Meier Plot

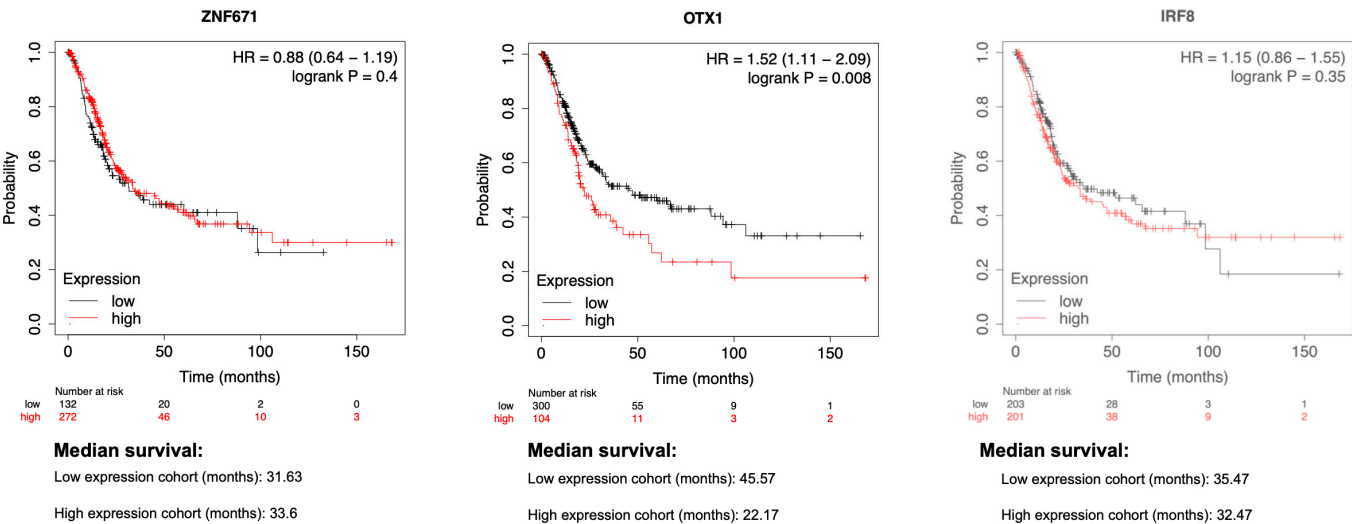

**Figure S1. Survival curves of ZNF671, OTX1, and IRF8.** The survival analysis of the three genes is based on their expression levels and utilizes the Kaplan-Meier method to generate survival curves. The graphics are generated by using the web server <https://kmplot.com/analysis/> (accessed on 7 February 2024).
